# Supplementary material for: The effect of grape seed procyanidins extract on cognitive function in elderly people with mild cognitive impairment: A randomized, double-blind, placebo-controlled clinical trial
Source: PubMed Central journal article supplement — Heliyon. 2023 Jun 5;9(6):e16994. doi: 10.1016/j.heliyon.2023.e16994 (PMC10300324; doi:10.1016/j.heliyon.2023.e16994), 2023-06-05
Supplement: mmc2.pdf [file mmc2.pdf]

## 黄石市老年人健康状况调查问卷

为了了解老年健康状况，提高老年人的生活质量和促进老年健康，我们开展这次调查，非常感谢您的配合。请在空格内填写或在适当的选择上“√”表示。

姓名：                    性别：                    民族：                    出生年月：

家庭住址：                    职业：                    联系电话：

1、您的每月收入：（1）低于 500 （2）500—1000 （3）1001—3000 （4）3001—5000 （5）5000 以上

2、文化程度：（1）大学本、专科或以上 （2）高中或中专 （3）初中 （4）小学 （5）文盲

3、婚姻状况：（1）未婚 （2）已婚 （3）离异 （4）丧偶 （5）再婚

4、目前居住情况：（1）独居 （2）与配偶居住 （3）与子女居住 （4）与配偶子女居住 （5）与其他人居住 （6）养老院

5、若没有与子女同住，请问子女的探视频率是：\_\_\_\_\_次/月

6、疾病家族史：（1）痴呆 （2）精神病 （3）冠心病 （4）高血压 （5）其他

7、您现在身体状况？（1）无疾病 （2）低血压 （3）高血压 （4）低血糖 （5）糖尿病 （6）高血脂 （7）脑卒中 （9）短暂性脑缺血 （10）冠心病 （11）其他心脏病 （12）肾脏病 （13）肿瘤 （14）代谢综合症 （15）骨质疏松 （16）关节炎 （17）抑郁症 （18）头部外伤史 （19）其他

8、您若患糖尿病：请填出患病年限：\_\_\_\_\_年；

    您若患高血压：请填出患病年限：\_\_\_\_\_年。

9、您现在吸烟吗？（1）吸烟 （2）以前吸，现在戒烟了 （3）从不吸烟

    选（1）请填①②        选（2）请填③        选（3）跳至 10 题

    ①现在平均每天吸多少支烟？\_\_\_\_\_支

    ②请问您吸烟多久了？1）不超过 5 年 2）5-10 年 3）11-15 年 4）16-20 年 5）超过 20 年 6）不知道

    ③从上次戒烟到现在有多久：\_\_\_\_\_年

10、您现在饮酒吗？（1）饮酒 （2）以前饮酒 （3）从不饮酒

    选（1）请填①        选（2）请填②        选（3）跳至 11 题

①现在每天饮酒\_\_\_\_\_两，每周饮酒\_\_\_\_\_次

②请问您上次饮酒到现在有多久? 1) 小于6个月 2) 6个月以上 3) 1年以上 4) 2年以上 9) 记不清

11、你现在饮茶吗? (1) 不饮 (2) 偶尔饮 (3) 经常饮

12、您的性格: (1) 内向 (2) 混合型 (3) 外向

13、你平常参加哪些体育锻炼: (1) 散步 (2) 慢跑 (3) 太极 (4) 舞蹈 (5) 其他\_\_\_\_\_

14、您每周锻炼的次数: (1) 小于或等于一次 (2) 2-4次 (3) 4次以上

15、您每次体育锻炼时间: (1) 30分钟以内 (2) 30分钟 (3) 1小时 (4) 2小时 (5) 2小时以上

16、您体育锻炼持续的年限: (1) <1年 (2) 1-3年 (3) 4-5年 (4) >5年

17、饮食情况: (1) 非常注意营养 (2) 有时注意营养 (3) 饮食很随便

18、食用保健品: (1) 经常 (2) 偶尔 (3) 从不食用

19、近两个月是否有药物滥用史? (1) 是 (2) 否

20、近两个月是否使用膳食补充剂? (1) 是 (2) 否

21、您的体重是: \_\_\_\_\_公斤。 您的身高是: \_\_\_\_\_厘米。

22、您与亲友邻居来往吗? (1) 经常 (2) 偶尔 (3) 从不

23、您做家务吗? (1) 经常 (2) 偶尔 (3) 从不

24、您经常与子女谈话交流吗? (1) 经常 (2) 偶尔 (3) 从不

25、您感觉夫妻关系亲密吗? (1) 很亲密 (2) 一般 (3) 冷淡

26、您感觉与子女关系亲密吗? (1) 很亲密 (2) 一般 (3) 冷淡

27、您有哪些业余爱好? (1) 书法 (2) 下棋 (3) 打牌、麻将 (4) 读书、看报 (5) 手工艺 (6) 看电视 (7) 其他\_\_\_\_\_

28、您近期睡眠情况怎么样? (1) 很好 (2) 一般 (3) 不好

29、您近一年记忆力是否感到明显下降? (1) 是 (2) 否

30、您近三年生活中是否发生过重大事件 (如: 财产损失, 意外伤害)  
(1) 是 (2) 否

## 日常生活活动能力量表

现在我想问些有关您平常做的事情,我想知道的是您自己做这些事情还是需要人家帮助或根本没办法做这些事。1.自己完全可以做 2.有些困难 3.需要帮助 4.根本无法做。

| 项目      | 自己完全可以做 | 有些困难,尚能完成 | 需要帮助 | 根本没法做 |
|---------|---------|-----------|------|-------|
| 乘坐公共汽车  | 1       | 2         | 3    | 4     |
| 行走      | 1       | 2         | 3    | 4     |
| 做饭菜     | 1       | 2         | 3    | 4     |
| 做家务     | 1       | 2         | 3    | 4     |
| 吃药      | 1       | 2         | 3    | 4     |
| 吃饭      | 1       | 2         | 3    | 4     |
| 穿衣      | 1       | 2         | 3    | 4     |
| 梳头、刷牙等  | 1       | 2         | 3    | 4     |
| 洗衣      | 1       | 2         | 3    | 4     |
| 洗澡      | 1       | 2         | 3    | 4     |
| 购物      | 1       | 2         | 3    | 4     |
| 定时上厕所   | 1       | 2         | 3    | 4     |
| 打电话     | 1       | 2         | 3    | 4     |
| 处理自己的钱财 | 1       | 2         | 3    | 4     |

### CDR记分表

|               | 健康 CDR=0                    | 可疑痴呆CDR=0.5              | 轻度痴呆 CDR=1                               | 中度痴呆 CDR=2                         | 重度痴呆 CDR=3                     | 得分  |
|---------------|-----------------------------|--------------------------|------------------------------------------|------------------------------------|--------------------------------|-----|
| 1. 记忆力        | 无记忆缺损或只有轻微的、偶尔的健忘           | 经常性的轻度健忘；对事情能部分回忆；“良性”健忘 | 中度记忆缺损，对近事遗忘突出，记忆缺损妨碍日常生活                | 严重记忆缺损；能记住过去非常熟悉的事情，新发生的事件很快遗忘     | 严重记忆丧失；仅存片段的记忆                 | _ 分 |
| 2. 定向力        | 能完全正确定向                     | 对时间关联性有轻微的困难，其余能完全正确定向   | 对时间关联性有中度困难；检查时对地点仍有定向能力；但在某些场合可能有地理定向障碍 | 对时间关联性有严重困难；通常对时间不能定向，常有地点失定向      | 仅对人物有定向力                       | _ 分 |
| 3. 判断与解决问题的能力 | 能很好的解决日常问题，处理事务和财务，判断力良好    | 在解决问题、辨别事物间的异同点方面有轻微缺损   | 在解决问题、辨别事物间的异同点方面有中度困难；通常还能维持社交事务判断力     | 在解决问题、辨别事物间的异同点方面有严重损害；社交事务判断力通常受损 | 不能做判断，或不能解决问题                  | _ 分 |
| 4. 社会事务       | 和平常一样能独立处理工作、购物、义务劳动及社会群体活动 | 在这些活动方面仅有轻微损害            | 虽然还能从事某些活动，但不能单独参与；不经意的观察，表面看似正常         | 不能独立进行室外活动；但可被带到家庭以外的场所参加活动        | 不能独立进行室外活动；病重得不能被带到家庭以外的场所参加活动 | _ 分 |
| 5. 家务与业余爱好    | 家庭生活、业余爱好和需用智力的兴趣均很好保持      | 家庭生活、业余爱好和需用智力的兴趣有轻微损害   | 家庭生活有肯定的轻度障碍，放弃难度大的家务，放弃复杂的爱好和兴趣         | 仅作简单家务，兴趣明显受限，而且维持的差               | 丧失有意义的家庭活动                     | _ 分 |
| 6. 个人自理能力     | 完全自理                        |                          | 须旁人监督或提醒                                 | 穿衣、个人卫生及个人事务料理都需要帮助                | 个人自理方面依赖别人给予很大帮助；经常大小便失禁       | _ 分 |
| 7. 总体得分       | 0                           | 0.5                      | 1                                        | 2                                  | 3                              | _ 分 |

# 蒙特利尔量表

MoCA Changsha Version

姓名:

教育水平:

主试者:

蒙特利尔认知评估长沙版

性别:

出生日期:

|                 |                                                                                                                                                                                                                                                               |                                                                                                                                                                                                                                                                                                                                                                                                                                                                                                                     |           |           |           |           |              |     |     |  |  |  |  |  |     |  |  |  |  |  |             |
|-----------------|---------------------------------------------------------------------------------------------------------------------------------------------------------------------------------------------------------------------------------------------------------------|---------------------------------------------------------------------------------------------------------------------------------------------------------------------------------------------------------------------------------------------------------------------------------------------------------------------------------------------------------------------------------------------------------------------------------------------------------------------------------------------------------------------|-----------|-----------|-----------|-----------|--------------|-----|-----|--|--|--|--|--|-----|--|--|--|--|--|-------------|
| <b>视空间/执行功能</b> | 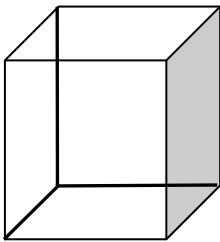 <p>临摹<br/>立方体</p>                                                                                                                                                           | <p>画钟表 (11 点过 10 分) (3 分)</p> <p>[ ] [ ] [ ]<br/>轮廓 指针 数字</p>                                                                                                                                                                                                                                                                                                                                                                                                                                                       | 得分        |           |           |           |              |     |     |  |  |  |  |  |     |  |  |  |  |  |             |
|                 | <div style="display: flex; justify-content: space-around; align-items: center;"> <div style="text-align: center;"> <p>5 结束</p> <p>1 开始</p> </div> <div style="text-align: center;"> <p>1</p> <p>2</p> <p>2</p> <p>4</p> <p>3</p> </div> </div> <p>[ ] [ ]</p> |                                                                                                                                                                                                                                                                                                                                                                                                                                                                                                                     | _/5       |           |           |           |              |     |     |  |  |  |  |  |     |  |  |  |  |  |             |
| <b>命名</b>       |  <p>[ ] [ ] [ ]</p>                                                                                                                                                        |                                                                                                                                                                                                                                                                                                                                                                                                                                                                                                                     |           | _/3       |           |           |              |     |     |  |  |  |  |  |     |  |  |  |  |  |             |
| <b>记忆</b>       | 朗读 右侧词语, 之后由受试者复述, 不论第一次复述是否完全正确, 重复朗读两遍词语, 并提醒受试者 5 分钟后回忆                                                                                                                                                                                                    | <table border="1" style="width:100%; border-collapse: collapse;"> <tr> <td></td> <td style="text-align: center;">脸面</td> <td style="text-align: center;">丝绸</td> <td style="text-align: center;">寺庙</td> <td style="text-align: center;">菊花</td> <td style="text-align: center;">红色</td> </tr> <tr> <td style="text-align: center;">第一遍</td> <td></td> <td></td> <td></td> <td></td> <td></td> </tr> <tr> <td style="text-align: center;">第二遍</td> <td></td> <td></td> <td></td> <td></td> <td></td> </tr> </table> |           | 脸面        | 丝绸        | 寺庙        | 菊花           | 红色  | 第一遍 |  |  |  |  |  | 第二遍 |  |  |  |  |  | 不<br>计<br>分 |
|                 | 脸面                                                                                                                                                                                                                                                            | 丝绸                                                                                                                                                                                                                                                                                                                                                                                                                                                                                                                  | 寺庙        | 菊花        | 红色        |           |              |     |     |  |  |  |  |  |     |  |  |  |  |  |             |
| 第一遍             |                                                                                                                                                                                                                                                               |                                                                                                                                                                                                                                                                                                                                                                                                                                                                                                                     |           |           |           |           |              |     |     |  |  |  |  |  |     |  |  |  |  |  |             |
| 第二遍             |                                                                                                                                                                                                                                                               |                                                                                                                                                                                                                                                                                                                                                                                                                                                                                                                     |           |           |           |           |              |     |     |  |  |  |  |  |     |  |  |  |  |  |             |
| <b>注意</b>       | 读出右侧数字 (每秒一个), 顺背 [ ] <b>21854</b><br>让受试者重复: 倒背 [ ] <b>742</b>                                                                                                                                                                                               |                                                                                                                                                                                                                                                                                                                                                                                                                                                                                                                     |           | _/2       |           |           |              |     |     |  |  |  |  |  |     |  |  |  |  |  |             |
|                 | 读出下列数字 (每秒一个), 每当数字 1 出现时, 受试者必须拍一下手 1, 两次或两次以上错误将不给分<br>[ ] <b>52139411806215194511141905112</b>                                                                                                                                                             |                                                                                                                                                                                                                                                                                                                                                                                                                                                                                                                     |           | _/1       |           |           |              |     |     |  |  |  |  |  |     |  |  |  |  |  |             |
|                 | <b>100 连续减 7</b> [ ] <b>93</b> [ ] <b>86</b> [ ] <b>79</b> [ ] <b>72</b> [ ] <b>65</b><br>4-5 个正确给 3 分, 2-3 个正确给 2 分, 1 个正确给 1 分, 全部错误给 0 分                                                                                                                   |                                                                                                                                                                                                                                                                                                                                                                                                                                                                                                                     |           | _/3       |           |           |              |     |     |  |  |  |  |  |     |  |  |  |  |  |             |
| <b>语言</b>       | 复述: 我   只知道   小张   是今天   来   帮过忙的人。 [ ]<br>狗   在房间   的时候  , 猫   总是   躲在   椅子下面。 [ ]                                                                                                                                                                           |                                                                                                                                                                                                                                                                                                                                                                                                                                                                                                                     |           | _/2       |           |           |              |     |     |  |  |  |  |  |     |  |  |  |  |  |             |
|                 | 流畅性: 在 1 分钟内尽可能多地说出动物的名字。 [ ] ___ (N ≥ 11 个记 1 分, 尽可能在空白处记下回答的内容)                                                                                                                                                                                             |                                                                                                                                                                                                                                                                                                                                                                                                                                                                                                                     |           | _/1       |           |           |              |     |     |  |  |  |  |  |     |  |  |  |  |  |             |
| <b>抽象</b>       | 相似性总结: 如香蕉—桔子=水果 [ ] 火车—自行车 [ ] 手表—尺子                                                                                                                                                                                                                         |                                                                                                                                                                                                                                                                                                                                                                                                                                                                                                                     |           | _/2       |           |           |              |     |     |  |  |  |  |  |     |  |  |  |  |  |             |
| <b>延迟回忆</b>     | 无提示回忆                                                                                                                                                                                                                                                         | 面孔<br>[ ]                                                                                                                                                                                                                                                                                                                                                                                                                                                                                                           | 丝绸<br>[ ] | 寺庙<br>[ ] | 菊花<br>[ ] | 红色<br>[ ] | 仅根据无提示回忆个数计分 |     |     |  |  |  |  |  |     |  |  |  |  |  |             |
| 选项              | 分类提示                                                                                                                                                                                                                                                          |                                                                                                                                                                                                                                                                                                                                                                                                                                                                                                                     |           |           |           |           |              |     |     |  |  |  |  |  |     |  |  |  |  |  |             |
|                 | 多选提示                                                                                                                                                                                                                                                          |                                                                                                                                                                                                                                                                                                                                                                                                                                                                                                                     |           |           |           |           |              | _/5 |     |  |  |  |  |  |     |  |  |  |  |  |             |
| <b>定向</b>       | [ ] 日 [ ] 月 [ ] 年 [ ] 星期几 [ ] 地点 [ ] 城市                                                                                                                                                                                                                       |                                                                                                                                                                                                                                                                                                                                                                                                                                                                                                                     |           |           |           |           |              |     |     |  |  |  |  |  |     |  |  |  |  |  |             |

总分: \_\_/30, 受教育年限 ≤ 6 年者加 1 分, 正常与异常之间的理想分值划分界点尚在课题组探索研究中。
